# Supplementary material
Source: bioRxiv or medRxiv preprint supplement (https://www.biorxiv.org/highwire/filestream/86063/field_highwire_adjunct_files/0/280347-1.pdf)
Supplement: Supplementary file [file 280347-1.pdf]

### A1 Autonomous Nervous System

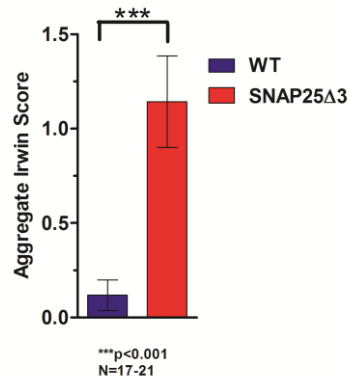

### A2 Somatomotor Systems

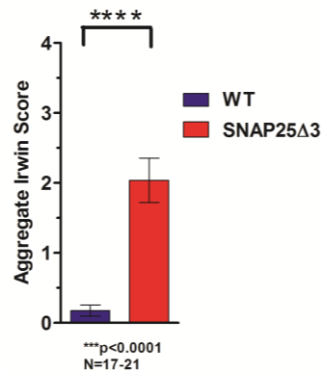

### B

| WT                              |      |      |      |
|---------------------------------|------|------|------|
| <b>Autonomic Nervous System</b> |      |      |      |
| Cohort                          | I    | II   | All  |
| Ptosis                          | -    | -    | -    |
| Exophthalmus                    | -    | -    | -    |
| Miosis                          | -    | -    | -    |
| Mydriasis                       | -    | -    | -    |
| Corneal reflex loss             | -    | -    | -    |
| Pinna reflex loss               | (+)  | -    | (+)  |
| Piloerection                    | -    | -    | -    |
| Respiratory rate                | -    | -    | -    |
| Writhing                        | -    | -    | -    |
| Tail erection                   | -    | (+)  | (+)  |
| Lacrimation                     | -    | -    | -    |
| Rectal temp. (°C)               | 36.5 | 36.6 | 36.6 |
| <b>Somatomotor systems</b>      |      |      |      |
| Motor activity                  | -    | -    | -    |
| Convulsions                     | -    | -    | -    |
| Arch/roll                       | -    | -    | -    |
| Tremors                         | -    | -    | -    |
| Leg weakness                    | (+)  | (+)  | (+)  |
| Rigid stance                    | -    | -    | -    |
| Spraddle                        | -    | -    | -    |
| Placing loss                    | -    | -    | -    |
| Grasping loss                   | -    | -    | -    |
| Righting loss                   | -    | -    | -    |
| Catalepsy                       | -    | -    | -    |
| Tail pinch                      | -    | -    | -    |
| Escape loss                     | -    | -    | -    |

| SNAP25 $\Delta$ 3               |      |      |      |
|---------------------------------|------|------|------|
| <b>Autonomic Nervous System</b> |      |      |      |
| Cohort                          | I    | II   | All  |
| Ptosis                          | -    | -    | -    |
| Exophthalmus                    | -    | -    | -    |
| Miosis                          | (+)  | (+)  | (+)  |
| Mydriasis                       | -    | -    | -    |
| Corneal reflex loss             | +    | (+)  | (+)  |
| Pinna reflex loss               | +    | +    | +    |
| Piloerection                    | (+)  | (+)  | (+)  |
| Respiratory rate                | -    | -    | -    |
| Writhing                        | -    | -    | -    |
| Tail erection                   | +    | +    | +    |
| Lacrimation                     | -    | -    | -    |
| Rectal temp. (°C)               | 36.4 | 36.6 | 36.5 |
| <b>Somatomotor systems</b>      |      |      |      |
| Motor activity                  | +    | +    | +    |
| Convulsions                     | -    | -    | -    |
| Arch/roll                       | -    | -    | -    |
| Tremors                         | -    | -    | -    |
| Leg weakness                    | +    | +    | +    |
| Rigid stance                    | -    | -    | -    |
| Spraddle                        | -    | -    | -    |
| Placing loss                    | +    | +    | +    |
| Grasping loss                   | -    | -    | -    |
| Righting loss                   | -    | -    | -    |
| Catalepsy                       | -    | -    | -    |
| Tail pinch                      | +    | (+)  | +    |
| Escape loss                     | +    | (+)  | +    |

**Supplementary Figure S1.** Neurobehavioral parameters screened in Modified Irwin Neurological Test Battery.
